# Supplementary material for: Boosting charge transfer with MoS2-grafted MXene interlayers for high-efficiency all-inorganic CsPbBr3 perovskite solar cells with an ultrahigh voltage of 1.701 V
Source: Royal Society of Chemistry journal article supplement (doi:10.1039/d4tc04398g), 2025-01-01
Supplement: d4tc04398g1.pdf [file d4tc04398g1.pdf]

## Supporting information

# Boosting Charge Transfer with MoS<sub>2</sub>-Grafted MXene Interlayer for High-Efficiency All-Inorganic CsPbBr<sub>3</sub> Perovskite Solar Cells with an Ultrahigh Voltage of 1.701 V

Qingwei Zhou<sup>a,b,\*</sup>, Hansheng Li<sup>a,b</sup>, Fan Wu<sup>a,b</sup>, Dan Chen<sup>a,b</sup>, Fang Luo<sup>a,b</sup>, Chucai Guo<sup>a,b,\*</sup>, Zhihong Zhu<sup>a,b</sup>

<sup>a</sup> College of Advanced Interdisciplinary Studies & Hunan Provincial Key Laboratory of Novel NanoOptoelectronic Information Materials and Devices, National University of Defense Technology, Changsha, Hunan 410073, China

<sup>b</sup> Nanhu Laser Laboratory, National University of Defense Technology, Changsha, Hunan 410073, China

\*Corresponding Author

*Email addresses:* zqw2100@163.com (Q. Zhou); gcc\_1981@163.com (C. Guo)

## Characterizations

The morphologies were obtained by a field emission SEM (Hitachi S4800) and TEM (Tecnai G2 F20). The X-ray photo electron spectroscopy (XPS) spectra were characterized using a multifunctional imaging electron spectrometer (Thermo ESCALAB 250XI) with an Al K $\alpha$  x-ray source. The element analysis was carried out using SEM (FEI QUANTA250 and Zeiss Gemini300). The AFM image was obtained by AFM (Seiko SPA400). The surface potential was characterized by KPFM (Multimode 8, Bruker, German). PL spectra were recorded via a fluorescence spectrometer excited by a 350 nm laser and the TRPL spectra were characterized using a Horiba spectrometer with an excitation wavelength of 500 nm. The characteristic *J-V* curves of PSCs were recorded on an electrochemical workstation (CHI660E) under irradiation of simulated solar light (Newport, Oriel Class 3A, 91195A). The light intensity was controlled at 100 mW cm<sup>-2</sup> calibrated by a standard silicon solar cell. The IPCE spectra of various devices were obtained using an IPCE kit from Enli Technology Co., Ltd. The *V*<sub>oc</sub> decay curves were measured at open-circuit mode by illuminating the device for several seconds, and then instantaneously switching off the light. Tafel curves and Mott-Schottky curves of various devices were measured on CHI660E electrochemical workstation.

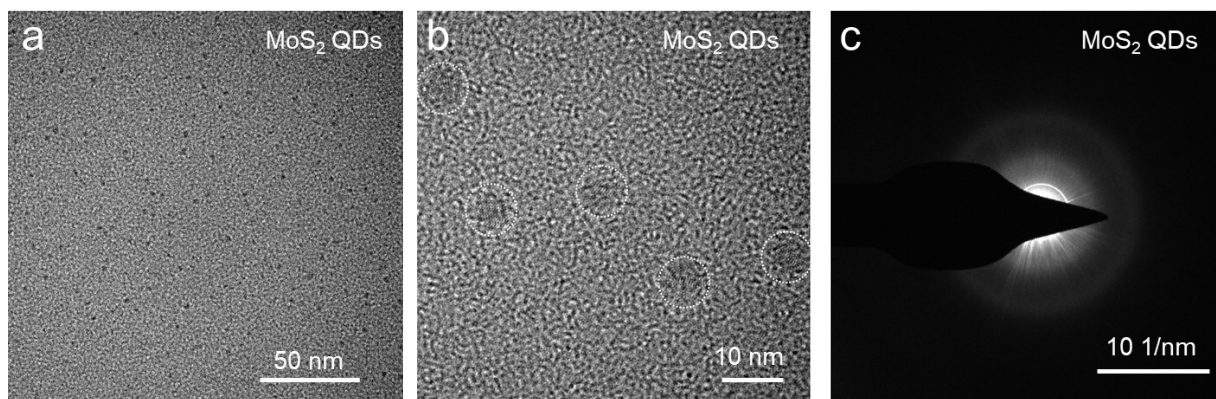

**Fig. S1.** (a,b)TEM images and (c) SAED patterns of MoS<sub>2</sub> QDs.

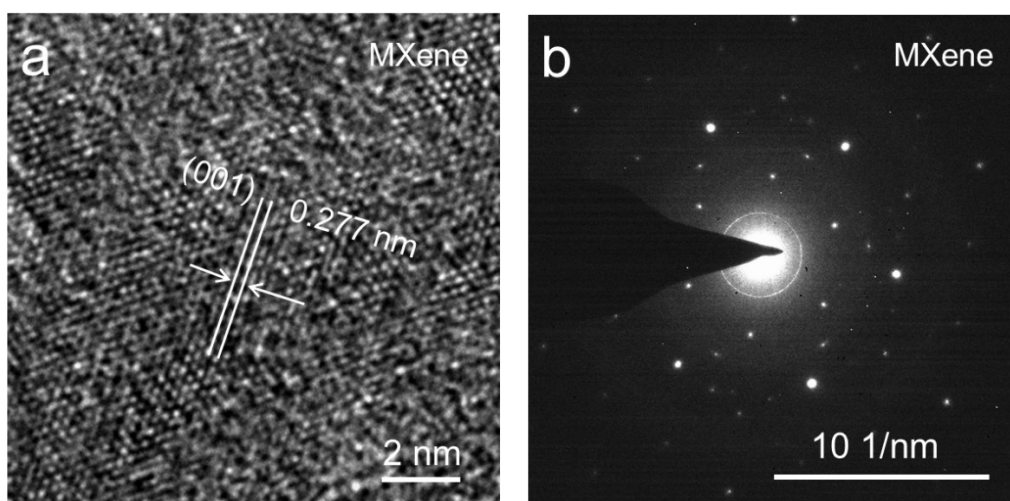

**Fig. S2.** (a) HRTEM image and (b) SAED patterns of MXene nanoflakes

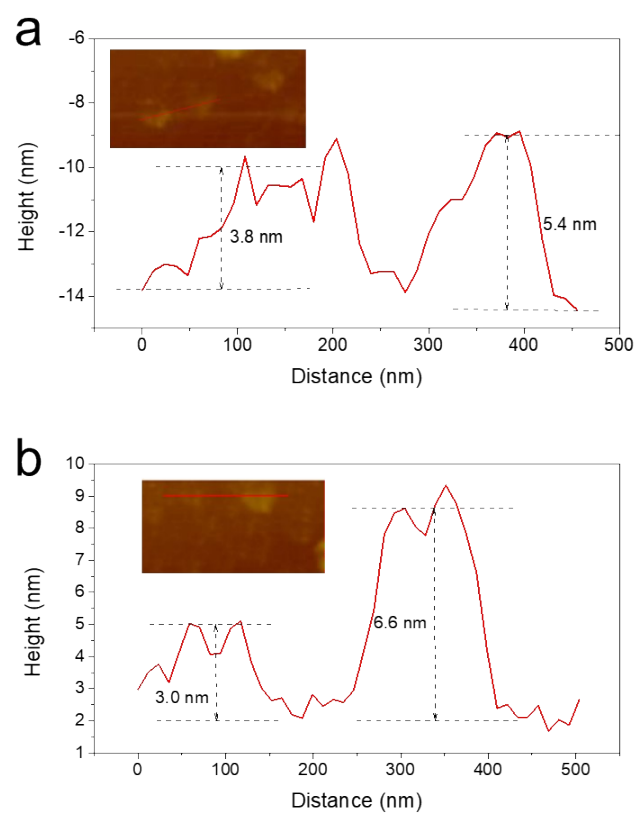

**Fig. S3.** Height profile of (a) MXene nanoflakes and (b) MoS<sub>2</sub>@MXene nanoflakes, insert is the corresponding AFM image.

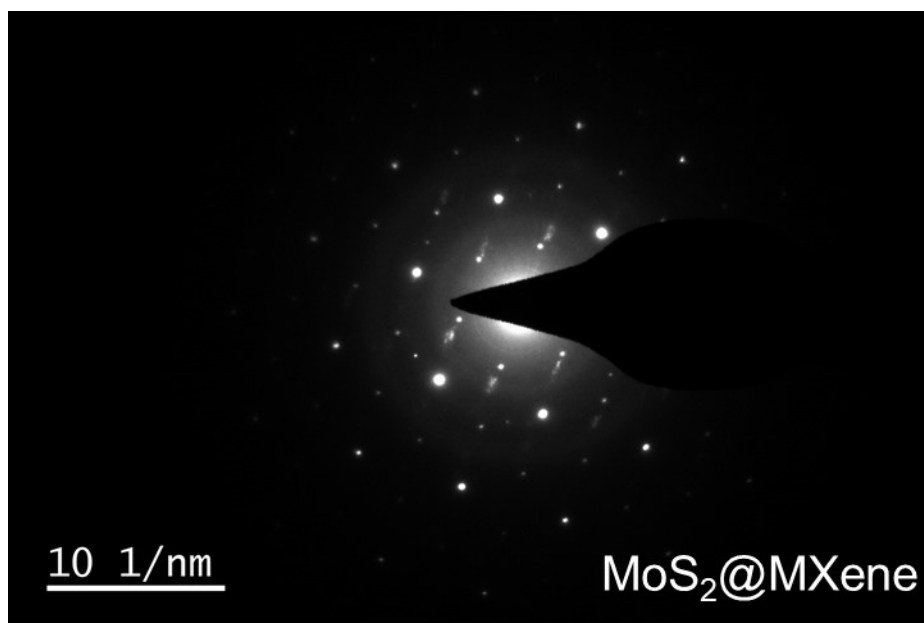

**Fig. S4.** SAED patterns of  $\text{MoS}_2\text{@MXene}$  nanoflakes.

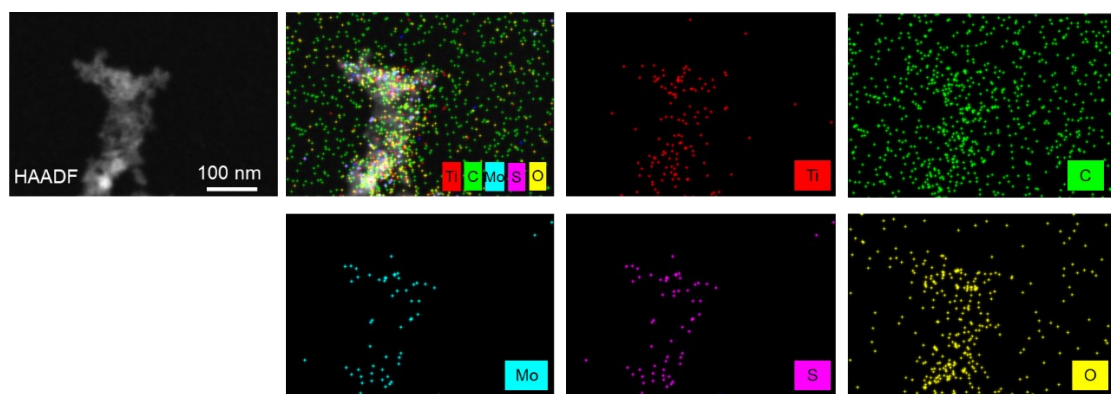

**Fig. S5.** HAADF image and the corresponding EDS mapping of MoS<sub>2</sub>@MXene nanoflakes.

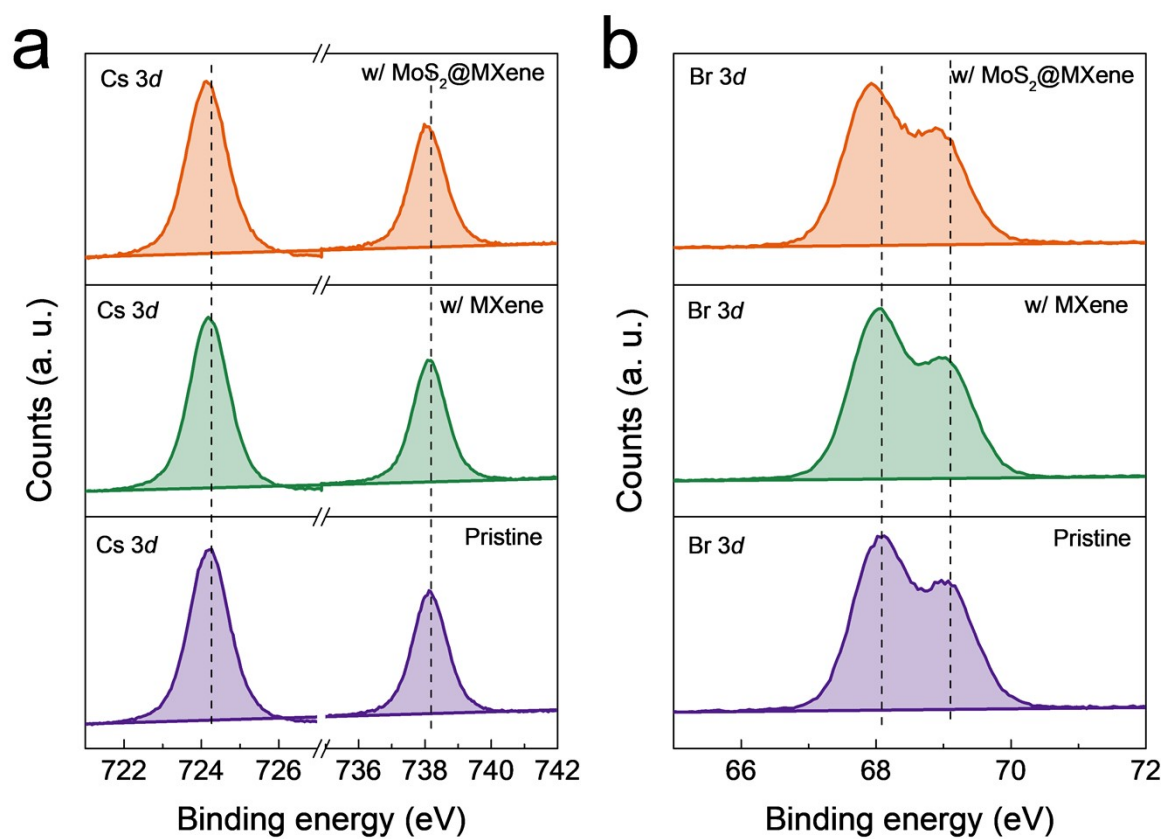

**Fig. S6.** XPS spectra of (a) Cs 3d and (b) Br 3d for CsPbBr<sub>3</sub> films with different modifications.

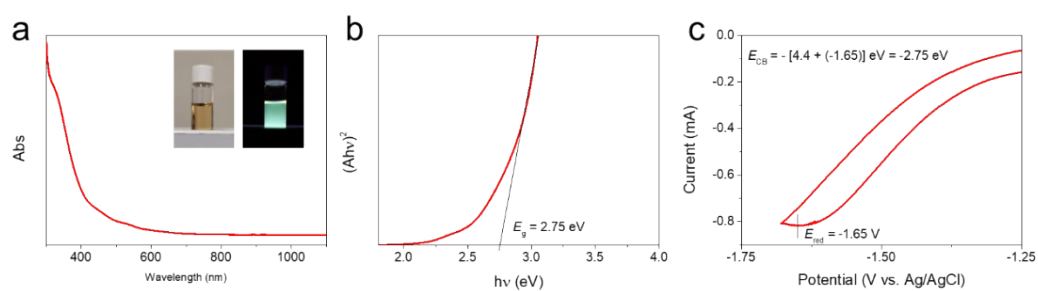

**Fig. S7.** (a, b) UV-Vis absorption spectra and (c) CV curves of (a) MoS<sub>2</sub> QDs. The inset image is the photographs of the MoS<sub>2</sub> QDs before and after illumination (365 nm).

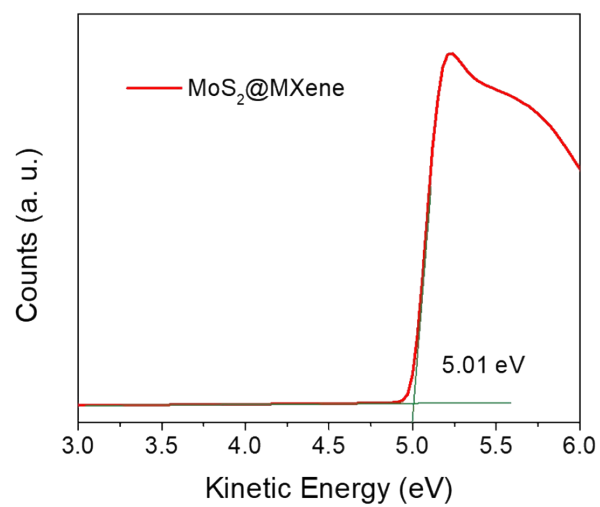

**Fig. S8.** Ultraviolet photoelectron spectrum of MoS<sub>2</sub>@MXene with a work function of -5.01 eV.

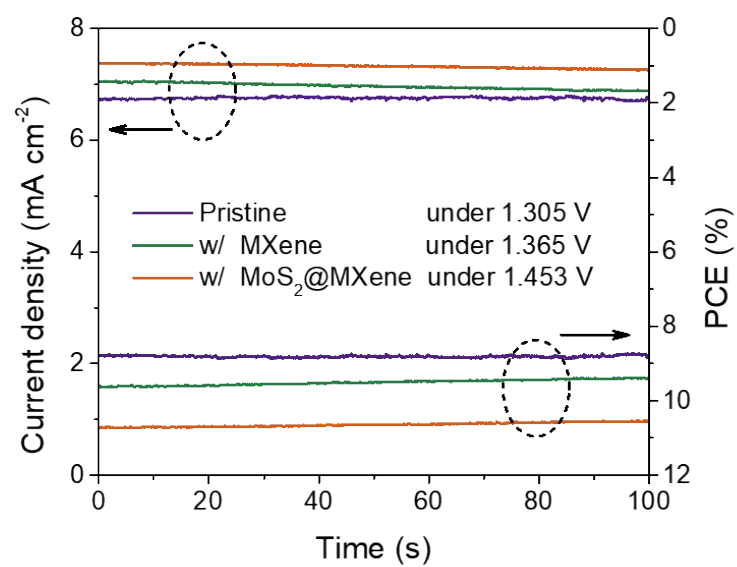

**Fig. S9.** Steady-state power output of the PSCs.

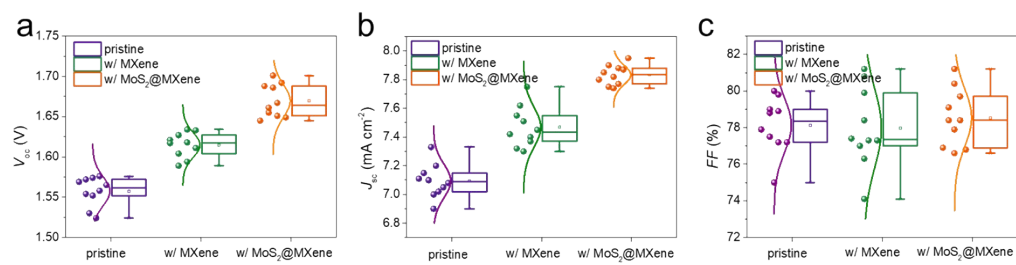

**Fig. S10.** Statistical distributions of  $V_{oc}$ ,  $J_{sc}$  and FF for PSCs with different modifications.

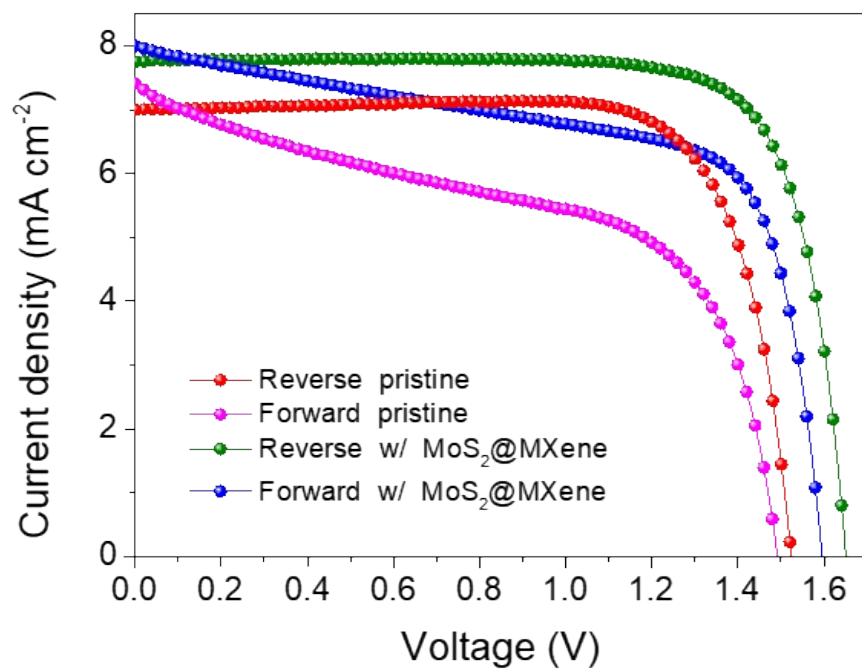

**Fig. S11.**  $J$ - $V$  curves for the CsPbBr<sub>3</sub> PSCs with and without MoS<sub>2</sub>@MXene under reverse and forward scans.

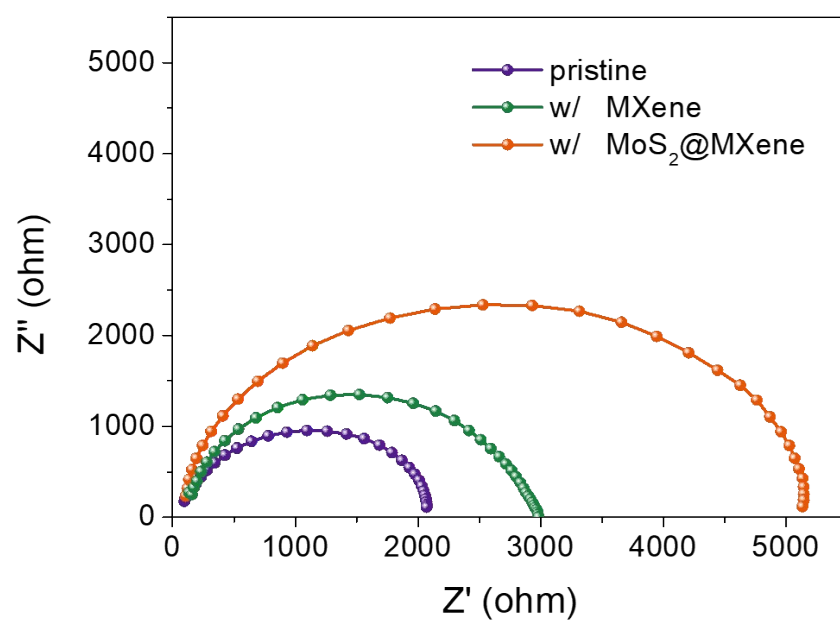

**Fig. S12.** EIS plots of various CsPbBr<sub>3</sub> PSCs.

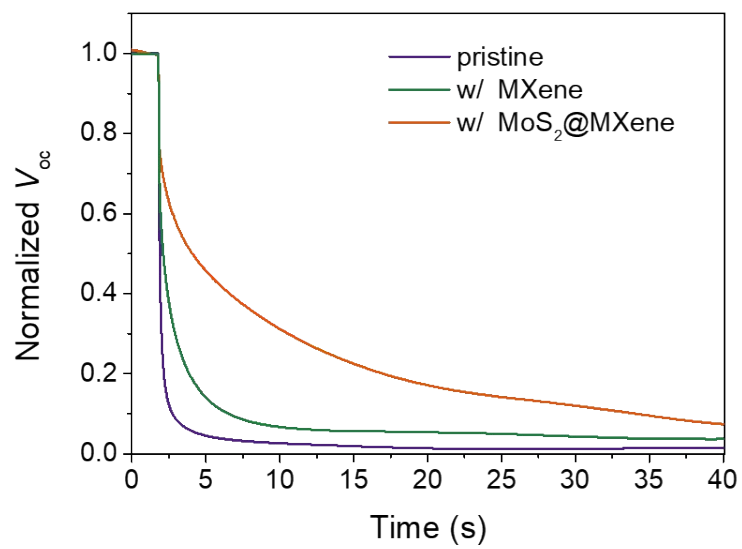

**Fig. S13.**  $V_{oc}$  decay curves of various CsPbBr<sub>3</sub> PSCs.

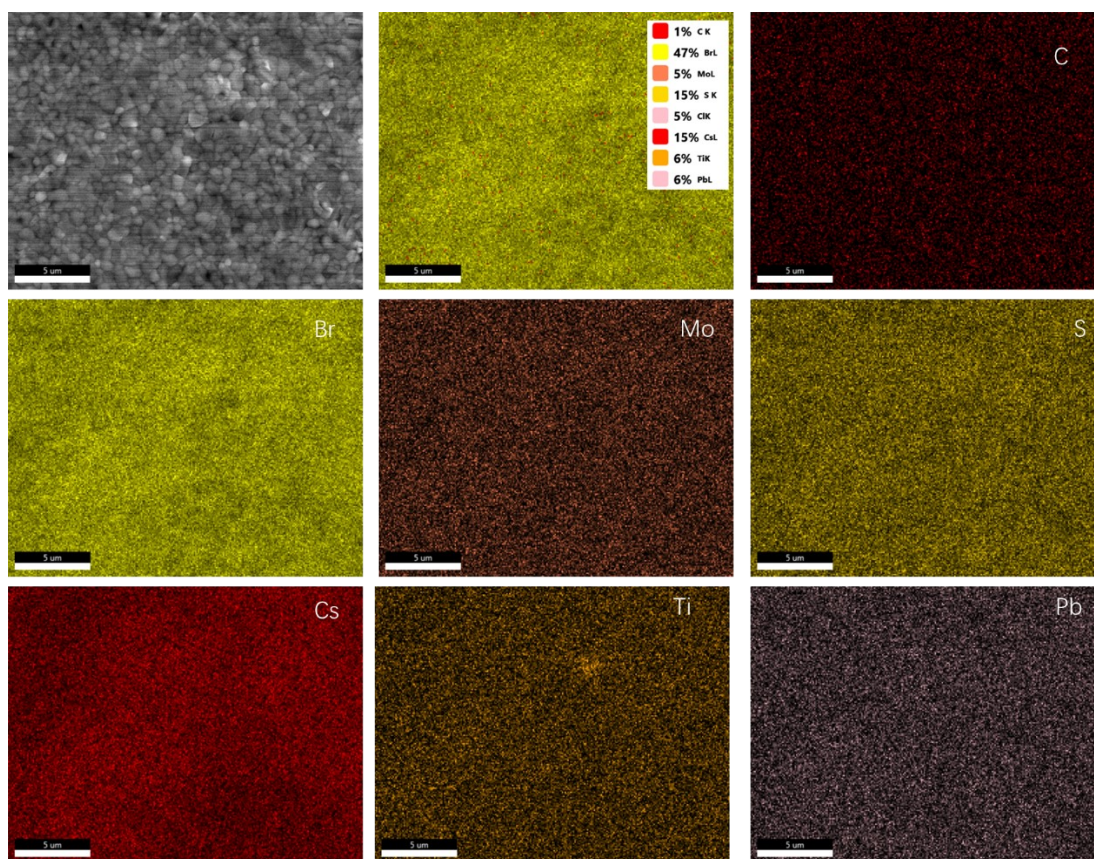

**Fig. S14.** SEM image and the corresponding EDS mapping images of CsPbBr<sub>3</sub> perovskite film with MoS<sub>2</sub>@MXene modification.

**Table S1.** Photovoltaic parameters for PSCs under reverse and forward scans.

| Devices                            | $V_{oc}$ (V) | $J_{sc}$ (mA/cm <sup>2</sup> ) | PCE (%) | FF (%) |
|------------------------------------|--------------|--------------------------------|---------|--------|
| Reverse pristine                   | 1.524        | 7.00                           | 8.24    | 77.2   |
| Forward pristine                   | 1.492        | 7.41                           | 5.91    | 53.5   |
| Reverse w/ MoS <sub>2</sub> @MXene | 1.651        | 7.75                           | 10.03   | 78.4   |
| Forward w/ MoS <sub>2</sub> @MXene | 1.595        | 8.00                           | 8.39    | 65.8   |

**Table S2.** TRPL decay parameters of PSCs with and without modifications.

| Device                     | $\tau_1$ (ns) | $a_1$  | $\tau_2$ (ns) | $a_2$  | $\tau_{ave}$ (ns) |
|----------------------------|---------------|--------|---------------|--------|-------------------|
| Pristine                   | 0.574         | 66.78% | 10.446        | 33.22% | 0.836             |
| w/ MXene                   | 0.527         | 69.76% | 23.664        | 30.24% | 0.749             |
| w/ MoS <sub>2</sub> @MXene | 0.486         | 80.61% | 8.369         | 19.39% | 0.594             |

The TRPL decay curves in Figure 3h can be fitted by employing a biexponential function as follows:

$$I = Ae^{-(t-t_0)/\tau_1} + Be^{-(t-t_0)/\tau_2}$$

Here,  $\tau_1$  corresponds to the faster component associated with trap-mediated nonradiative recombination, while  $\tau_2$  is related to the slower component linked to radiative recombination. To assess the electron extraction ability, the average decay time ( $\tau_{ave}$ ) is calculated based on the formula  $\tau_{ave} = (a_1\tau_1^2 + a_2\tau_2^2)/(a_1\tau_1 + a_2\tau_2)$ , where  $a_1$  and  $a_2$  denote the amplitudes. The specific parameters of  $\tau_1$ ,  $\tau_2$ , and  $\tau_{ave}$  are listed in Table S2.
